# Supplementary material
Source: publisher figshare collection journal article supplement (https://acs.figshare.com/ndownloader/files/34981618)
Supplement: Supplementary file 1 [file 34981618]

**Supporting Information:**

**Macroscopic single-phase monolayer borophene on  
arbitrary substrates**

*Borna Radatović,\* Valentino Jadriško, Sherif Kamal, Marko Kralj, Dino Novko, Nataša Vujičić, Marin  
Petrović\**

Center of Excellence for Advanced Materials and Sensing Devices, Institute of Physics, Bijenička 46,  
10000 Zagreb, Croatia

E-mail: [bradatovic@ifs.hr](mailto:bradatovic@ifs.hr); [mpetrovic@ifs.hr](mailto:mpetrovic@ifs.hr)

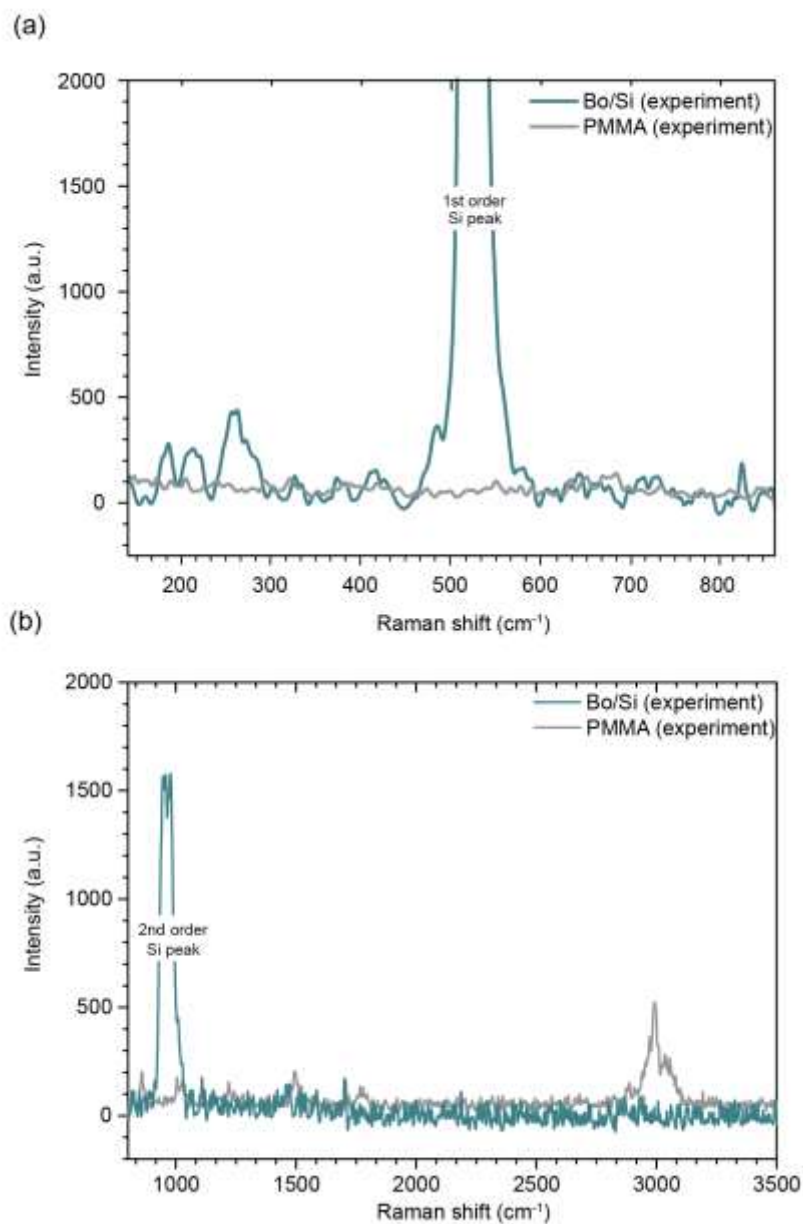

**Figure S1.** Comparison of Raman spectra of Bo/Si and a reference PMMA sample for two different spectral ranges: (a) from 190 up to 800  $\text{cm}^{-1}$  and (b) from 801 up to 3500  $\text{cm}^{-1}$ . The spectra of both samples have been measured under the same experimental conditions.
